# Supplementary material
Source: publisher figshare collection journal article supplement (https://sage.figshare.com/ndownloader/files/24233703)
Supplement: Supplementary file 1 [file 24233703]

## Appendix A

| Variable label                   | Question                                                                                                               | M    | SD   | Median | 1Q   | 3Q   |
|----------------------------------|------------------------------------------------------------------------------------------------------------------------|------|------|--------|------|------|
| Internet for TV                  | How often do you use the Internet to watch TV programmes or videos? (e.g. YouTube, Zattoo...)                          | 2.99 | 0.83 | 3.00   | 2.00 | 4.00 |
| Internet for information seeking | How often do you use the Internet to search for information (e.g., Wikipedia, Google, Yahoo Answer, FocusJunior, ...)? | 2.36 | 0.80 | 2.00   | 2.00 | 3.00 |
| Internet for music               | How often do you use the Internet to listen to music (e.g., Soundcloud, Youtube, iTube, ...)?                          | 3.00 | 0.89 | 3.00   | 2.00 | 4.00 |
| Internet for social network      | How often do you use the Internet for social networking activities (e.g., Facebook, Twitter, Instagram, ...)?          | 2.42 | 1.14 | 2.00   | 1.00 | 3.00 |
| Internet for school              | How often do you use the Internet to do research for school?                                                           | 2.17 | 0.79 | 2.00   | 2.00 | 3.00 |
| Internet for messaging           | How often do you use instant messaging applications?                                                                   | 3.01 | 0.93 | 3.00   | 2.00 | 4.00 |
| Internet for news                | How often do you search for news on the Internet?                                                                      | 1.89 | 0.77 | 2.00   | 1.00 | 2.00 |
| Internet for gaming              | How often do you use the Internet for online gaming (es: Final Fantasy, World of Warcraft, ...)?                       | 1.95 | 1.00 | 2.00   | 1.00 | 3.00 |
| Internet for health              | How often do you search for health information on the Internet?                                                        | 1.63 | 0.76 | 1.00   | 1.00 | 2.00 |
| Internet for games information   | How often do you search online gaming information on the Internet?                                                     | 1.92 | 0.99 | 2.00   | 1.00 | 3.00 |
| Internet (weekday)               | During a typical weekday, out of school, how often do you use the Internet?                                            | 2.55 | 0.86 | 2.00   | 2.00 | 3.00 |
| Internet (weekend)               | During a typical weekend day, how often do you use the Internet?                                                       | 3.01 | 0.85 | 3.00   | 2.00 | 4.00 |
| Smartphone (weekday)             | During a typical weekday, out of school, how often do you use the smartphone?                                          | 2.55 | 0.91 | 2.00   | 2.00 | 3.00 |
| Smartphone (weekend)             | During a typical weekend day, how often do you use the smartphone?                                                     | 3.03 | 0.90 | 3.00   | 2.00 | 4.00 |
| Reading books                    | During a typical weekday, out of school, how often do you read a book for fun?                                         | 2.07 | 0.77 | 2.00   | 2.00 | 2.00 |
| Friends                          | During a typical weekday, out of school, how often do you spend time with friends?                                     | 3.06 | 0.97 | 3.00   | 2.00 | 4.00 |
| Homework                         | During a typical weekday, out of school, how often do you do the homework                                              | 2.67 | 0.74 | 3.00   | 2.00 | 3.00 |
| Sleep                            | Sleep duration calculated from: When did you go to sleep last night? and When did you get up this morning?             | 2.73 | 0.64 | 3.00   | 2.00 | 3.00 |

Note: Answer format for activities reported in the "Measures" section of the article; 1Q = 1st quartile, 3Q = 3rd quartile
